# Supplementary material for: Dual-adjuvant mucosal vaccine leveraging mast cell and TLR9 agonists for protection against poxvirus infection
Source: Royal Society of Chemistry journal article supplement (doi:10.1039/d5pm00380f), 2026-06-04
Supplement: d5pm00380f1.pdf [file d5pm00380f1.pdf]

## Supplemental Data: Dual-Adjuvant Mucosal Vaccine Leveraging Mast Cell and TLR9 Agonists for Protection Against Poxvirus Infection

**Connor T. Murphy<sup>1</sup>, Grace L. Williamson<sup>1</sup>, Luis Ontiveros-Padilla<sup>1</sup>, Aaron T. Hendricksen<sup>1</sup>, Brandi T. Johnson-Weaver<sup>3</sup>, Hae Woong Choi<sup>3</sup>, David M. Gooden<sup>4</sup>, Santhosh Kalpathy<sup>4</sup>, Alexandra M. Lopez<sup>1</sup>, Erik S. Pena<sup>2</sup>, Jacob M. Bachelder<sup>5</sup>, Rani S. Sellers<sup>6</sup>, Soman N. Abraham<sup>3</sup>, Herman F. Staats<sup>3,7</sup>, Kristy M. Ainslie<sup>1,2,8\*</sup>**

<sup>1</sup>Division of Pharmacoengineering & Molecular Pharmaceutics, Eshelman School of Pharmacy, UNC, Chapel Hill, NC, USA

<sup>2</sup>Department of Biomedical Engineering, NC State/UNC, Chapel Hill, NC, USA

<sup>3</sup>Department of Pathology, Duke University, Durham, NC, US

<sup>4</sup>Department of Chemistry, Duke University, Durham, NC, US

<sup>5</sup>Carborro High School, Chapel Hill, NC, US

<sup>6</sup>Department of Pathology & Laboratory Medicine, School of Medicine, UNC, Chapel Hill, NC

<sup>7</sup>Duke Human Vaccine Institute, Duke University School of Medicine, Durham, NC, USA

<sup>8</sup>Department of Microbiology and Immunology, School of Medicine, UNC, Chapel Hill, NC, USA

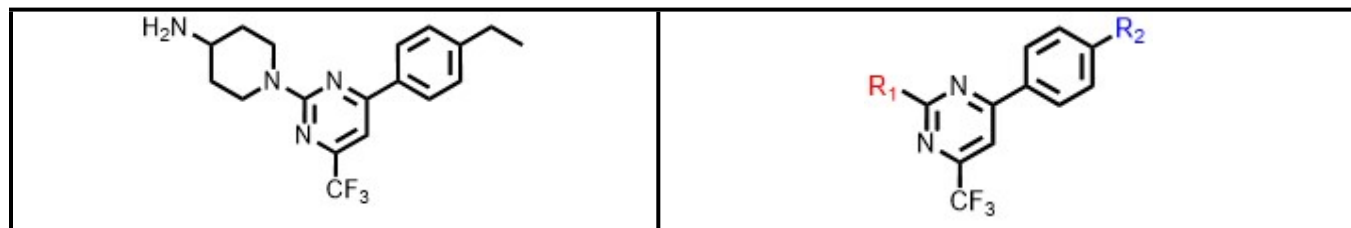

| (Parent) |           |                                                                                     |                | (Core scaffold) |           |                                                                                       |                |
|----------|-----------|-------------------------------------------------------------------------------------|----------------|-----------------|-----------|---------------------------------------------------------------------------------------|----------------|
| Entry    | VAP reg # | R <sub>1</sub>                                                                      | R <sub>2</sub> | Entry           | VAP reg # | R <sub>1</sub>                                                                        | R <sub>2</sub> |
| 1        | 1136      | 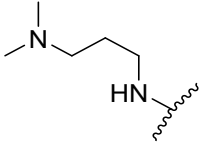   | Et             | 19              | 1166      |    | Et             |
| 2        | 1137      |    | Et             | 20              | 1167      |    | Et             |
| 3        | 1138      |    | Et             | 21              | 1169      |    | MeO            |
| 4        | 1143      |   | Et             | 22              | 1170      |   | MeO            |
| 5        | 1144      |  | Et             | 23              | 1171      |  | Et             |
| 6        | 1145      |  | EtO            | 24              | 1172      |  | MeO            |
| 7        | 1146      |  | <i>i</i> -Pr   | 25              | 1173      |  | EtO            |
| 8        | 1151      |  | EtO            | 26              | 1174      |  | <i>i</i> -Pr   |
| 9        | 1153      |  | <i>i</i> -Pr   | 27              | 1176      |  | MeO            |

|           |      |                                                                                     |         |           |      |                                                                                       |              |
|-----------|------|-------------------------------------------------------------------------------------|---------|-----------|------|---------------------------------------------------------------------------------------|--------------|
| <b>10</b> | 1154 | 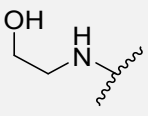   | Et      | <b>28</b> | 1177 |    | EtO          |
| <b>11</b> | 1155 |    | Et      | <b>29</b> | 1178 |    | <i>i</i> -Pr |
| <b>12</b> | 1156 |    | Et      | <b>30</b> | 1180 |    | MeO          |
| <b>13</b> | 1158 |    | Et      | <b>31</b> | 1181 |    | EtO          |
| <b>14</b> | 1159 |    | Et      | <b>32</b> | 1182 |    | <i>i</i> -Pr |
| <b>15</b> | 1160 |  | Et      | <b>33</b> | 1183 |  | MeO          |
| <b>16</b> | 1161 |  | Et      | <b>34</b> | 1184 |  | EtO          |
| <b>17</b> | 1162 |  | Et      | <b>35</b> | 1185 |  | <i>i</i> -Pr |
| <b>18</b> | 1164 | 4-Cl-Ph                                                                             | 4-Cl-Ph |           |      |                                                                                       |              |

**Supplemental Table 1.** The 35 analogs of ST101036 following SAR analysis.

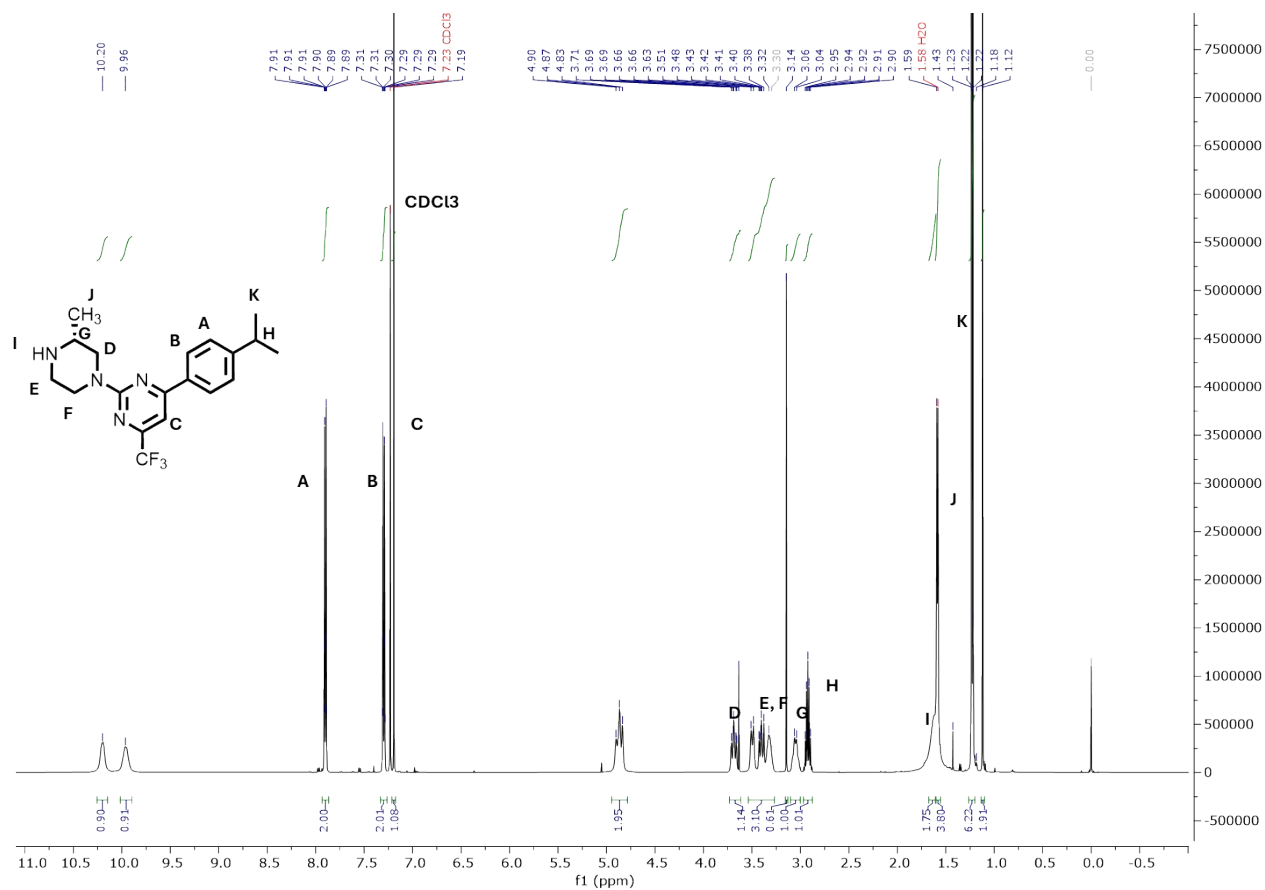

**Supplemental Figure 1.** <sup>1</sup>H-NMR spectrum of VAP-1185. <sup>1</sup>H NMR (500 MHz, CDCl<sub>3</sub>): δ10.20 (s, 1H, N-H), 9.96 (s, 1H, N-H), 7.91 (d, *J* = 8.2 Hz, 2H, Ar-H), 7.30 (d, *J* = 8.2 Hz, 2H, Ar-H), 7.19 (s, 1H), 4.90–4.80 (m, 2H), 3.75–3.60 (m, 2H), 3.51–3.40 (m, 2H), 3.14 (s, 3H, N-CH<sub>3</sub>), 3.08–2.90 (m, 2H), 1.59 (d, *J* = 6.8 Hz, 6H, CH(CH<sub>3</sub>)<sub>2</sub>), 1.43 (m, 1H, CH(CH<sub>3</sub>)<sub>2</sub>).

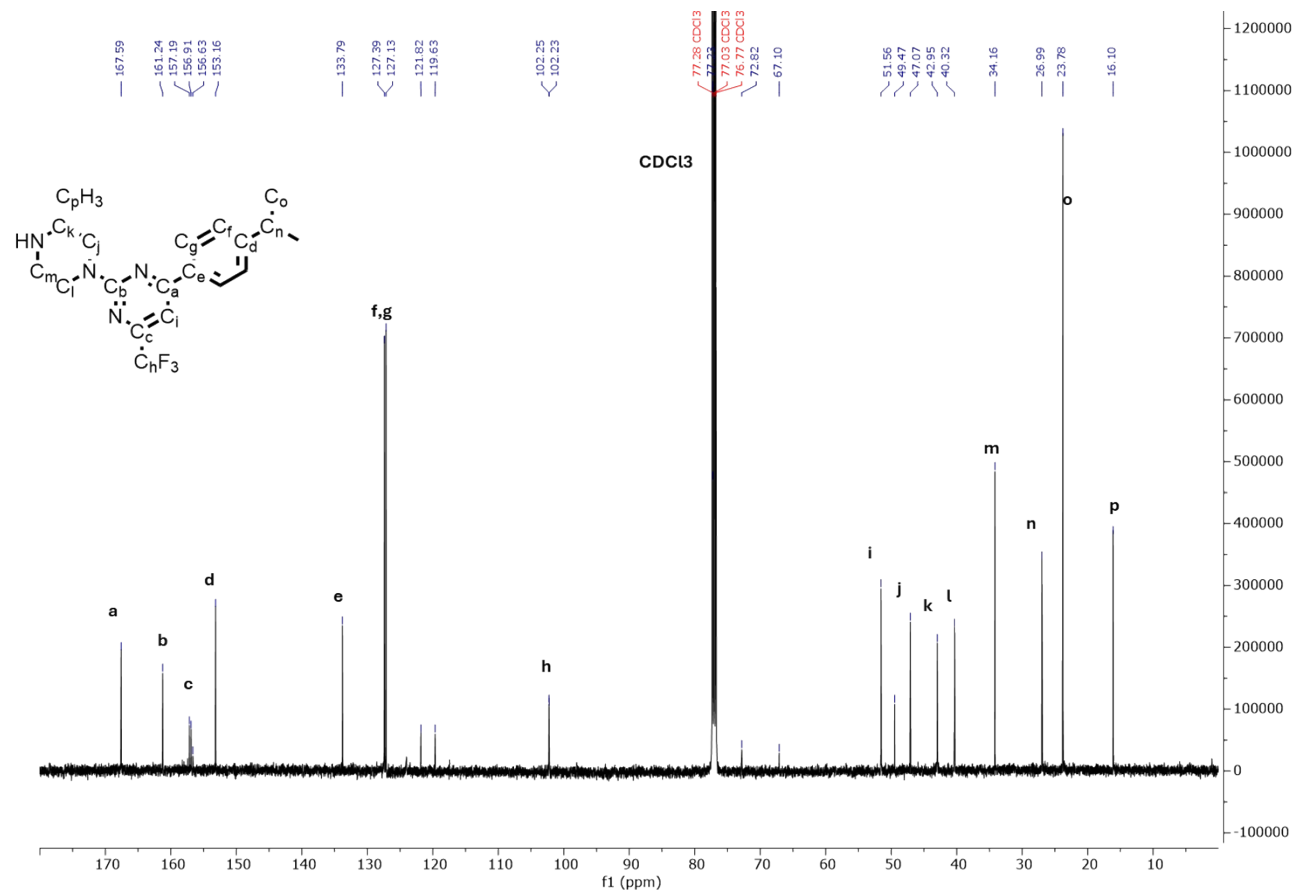

**Supplemental Figure 2.**  $^{13}\text{C}$ -NMR spectrum of VAP-1185.  $^{13}\text{C}$  NMR (100 MHz,  $\text{CDCl}_3$ ):  $\delta$  167.59 (a), 161.24 (b), 157.19 (q,  $J = 35.2$  Hz, c), 153.16 (d), 133.79 (e), 127.39 (f), 127.13 (g), 121.82 (q,  $J = 274.5$  Hz,  $\text{CF}_3$ ), 102.25 (h), 51.56 (i), 47.07 (j), 42.95 (k), 40.32 (l), 34.16 (m), 26.99 (n), 23.78 (o), 16.10 (p).

VAP-1185 #1-100 RT: 0.01-1.30 AV: 100 NL: 9.79E9  
T: FTMS + p ESI Full ms [150.0000-2000.0000]

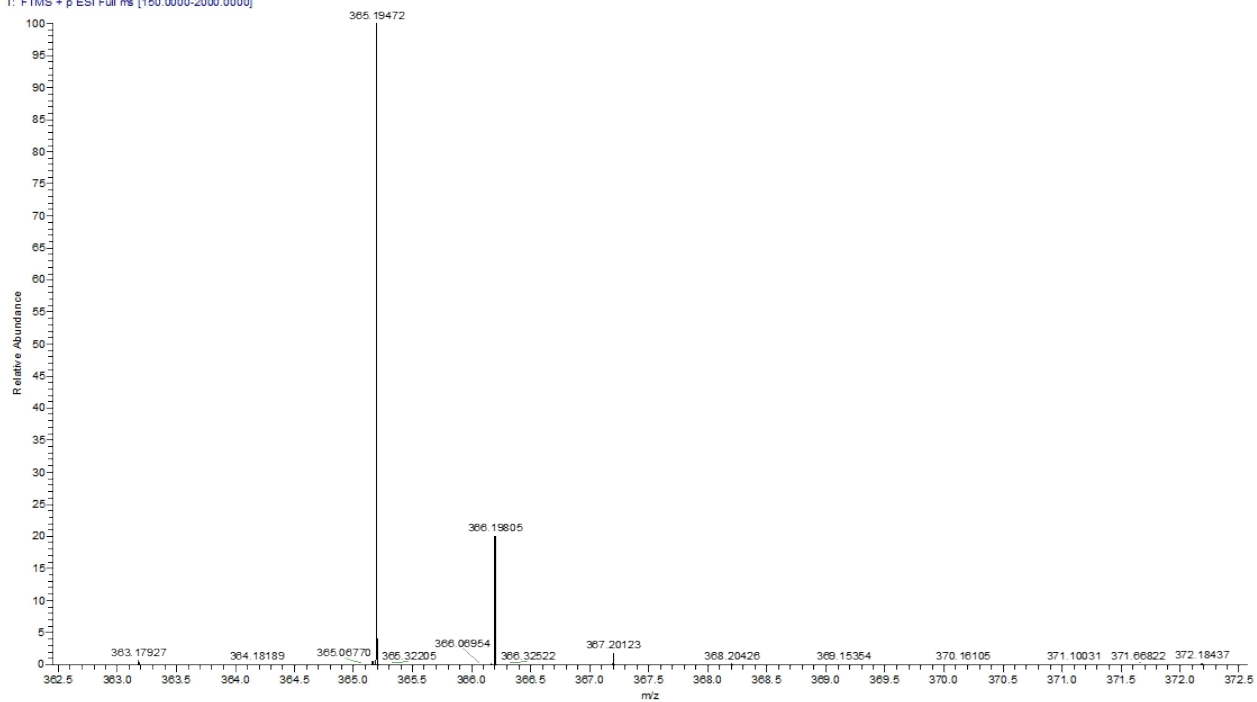

**Supplemental Figure 3.** Mass spectrum of VAP-1185. Predicted:  $C_{19}H_{23}F_3N_4 [M+H]^+$ :  $m/z = 365.2$ ; Observed:  $C_{19}H_{23}F_3N_4 [M+H]^+$   $m/z = 365.19472$ . Mass error =  $-0.103$  ppm.

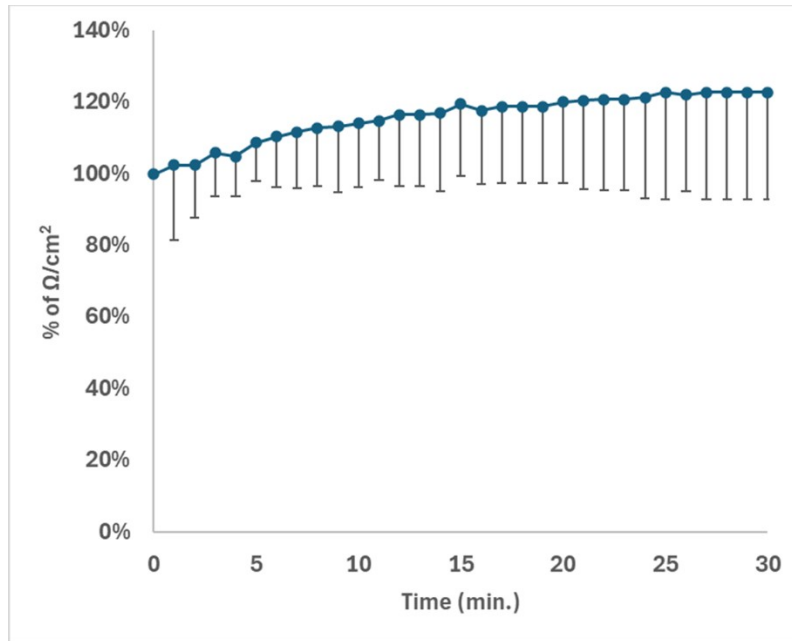

**Supplemental Figure 4.** RPMI 2650 cells were treated with VAP-1185 for 30 minutes and TEER was measured. Data presented as mean + SD.

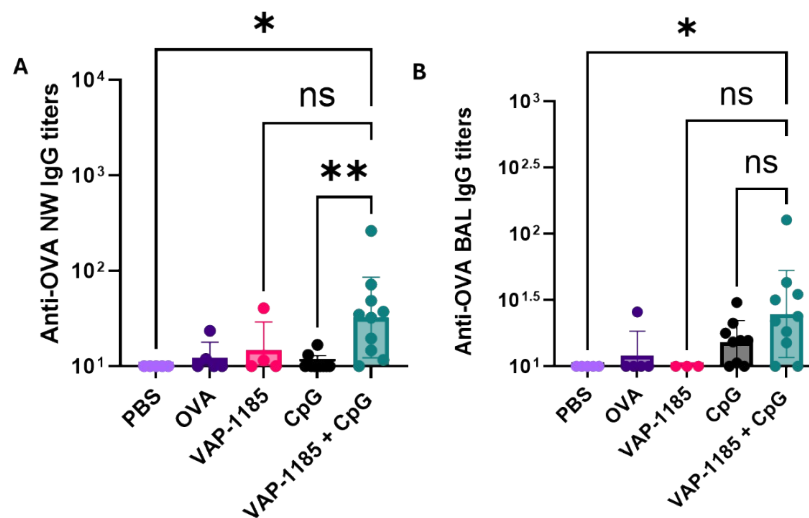

**Supplemental Figure 5.** Mice were euthanized on day 63 and total IgG was analyzed for (A) NW and (B) BAL. Data presented as mean + SD. Significant differences determined by using a one-way ANOVA with Tukey's multiple comparisons (ns = not significant; \* $p \leq 0.05$ ; \*\* $p \leq 0.01$ ).

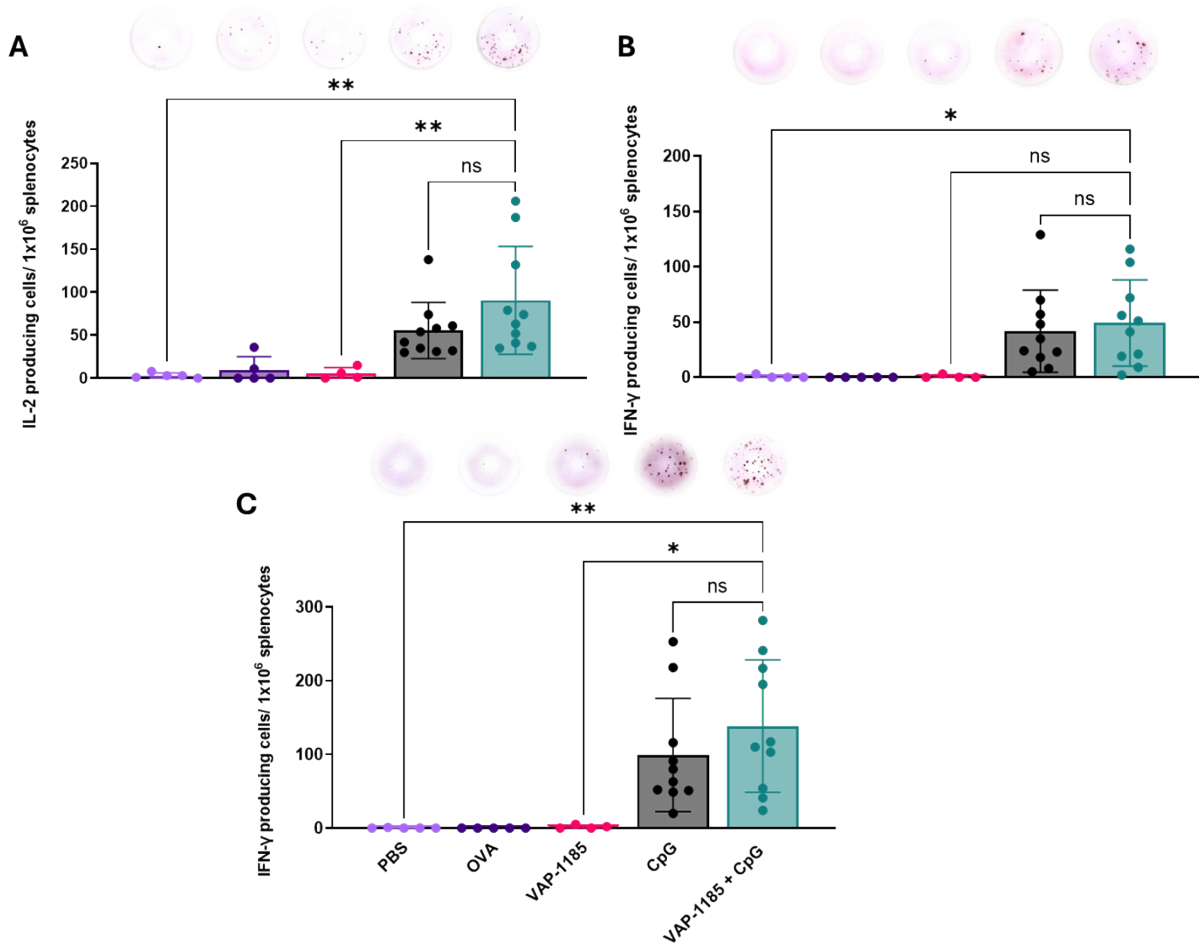

**Supplemental Figure 6.** ELISpots of splenocytes stimulated with the complete OVA protein that produced (A) IL-2 and (B) IFN- $\gamma$ . ELISpot of splenocytes stimulated with the OVA peptide, SIINFEKL that produced (C) IFN- $\gamma$ . (For PBS, OVA, and VAP-1185 groups  $n=5$ ; for CpG and VAP-1185+CpG groups  $n=10$ ). Data presented as mean  $\pm$  SD. Significant differences determined by using a one-way ANOVA with Tukey's multiple comparisons (ns = not significant; \* $p \leq 0.05$ ; \*\* $p \leq 0.01$ ).

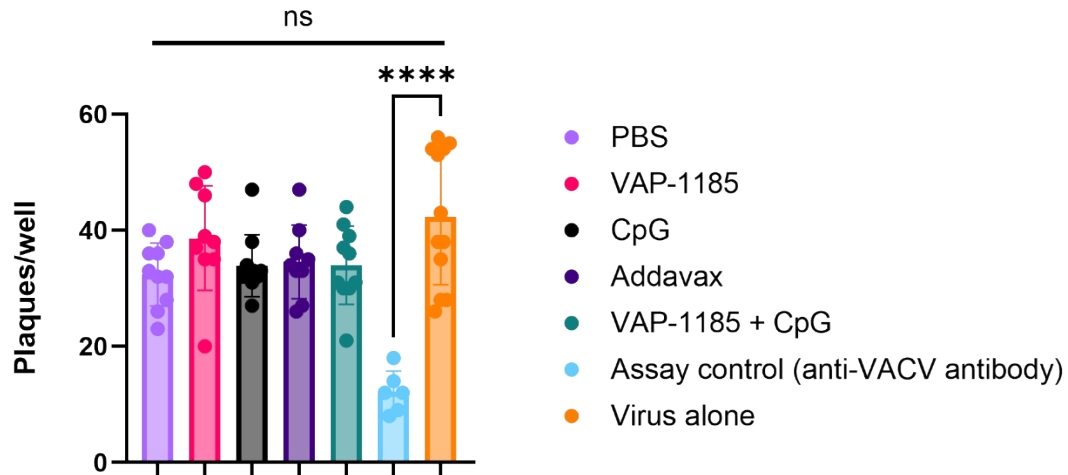

**Supplemental Figure 7.** Serum from day 56 was used to perform a PRNT assay. Data presented as mean  $\pm$  SD. Significant differences determined by using a one-way ANOVA with Tukey's multiple comparisons (ns = not significant; \*\*\*\* $p \leq 0.001$ ).
